# Supplementary material
Source: Springer Nature journal article supplement (https://www.springermedizin.de/resource/supplementary/12877_2008_145_MOESM2_ESM.pdf/9441264)
Supplement: MOESM2 [file 9441264]

**Total number that attended the information sessions N = 55**

**Exclusion N = 24**  
**Not meeting inclusion criteria (n = 8); refused to participate (n = 16)**

**Total number of participants registered N = 31**

**Group Internal Focus N = 15**

**Group External Focus N = 16**

**Received allocated intervention n = 15**

**Received allocated intervention n = 15**  
(1 participant withdrew after randomisation)

**Losses (N = 1):**  
**Reason for discontinued intervention:**  
**developed pain in the hip and knee due to arthrosis following the training**

**Losses (N = 3):**  
**Reasons for discontinued intervention:**  
**Unspecific back pain after training (1); bronchial pneumonia (1); neurological condition (1)**

**Outcome data 5 weeks: N = 14 with data**

**Outcome data 5 weeks: N = 12 with data**
